# Supplementary material
Source: publisher site journal article supplement (https://www.dovepress.com/get_supplementary_file.php?f=217101.docx)
Supplement: Supplementary file 1 [file get_supplementary_file.php]

**Supplementary Figure legends**

**
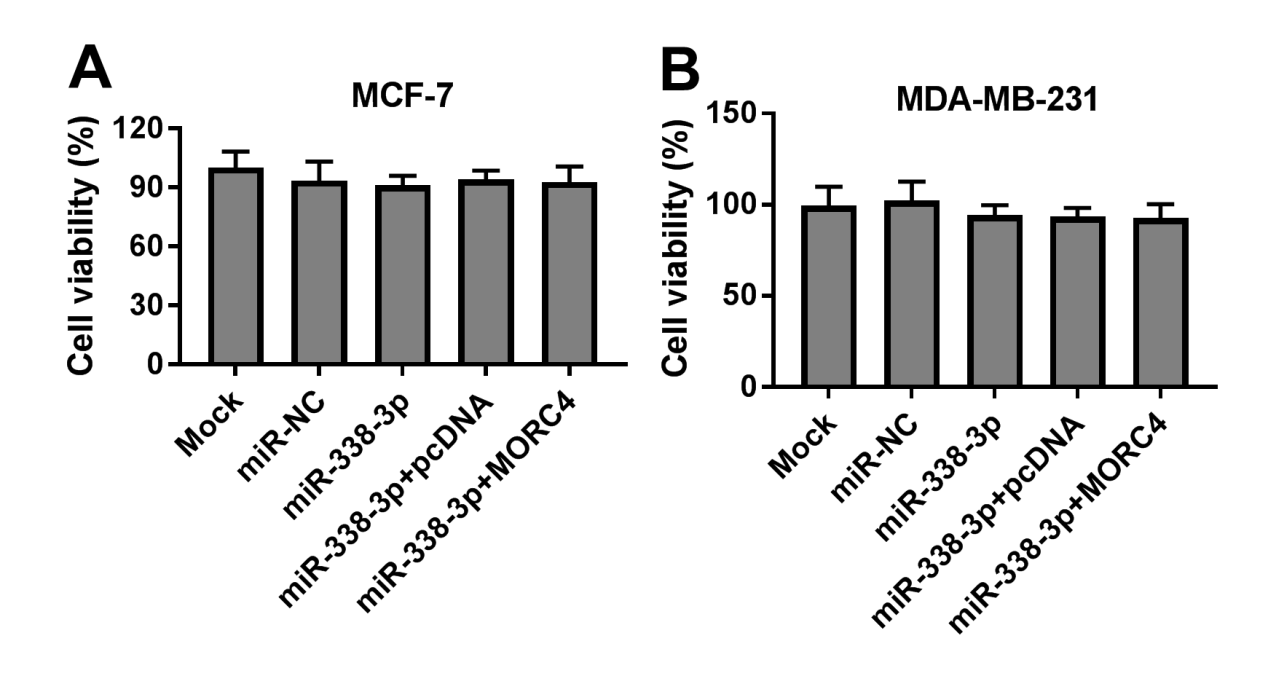
**

**Supplementary Figure 1. The effect of miR-338-3p and MORC4 on the cell viability.** (A and B) Cell viability was measured in MCF-7 and MDA-MB-231 cells transfected with miR-NC, miR-338-3p, miR-338-3p and pcDNA or MORC4 at 12 h by MTT assay.


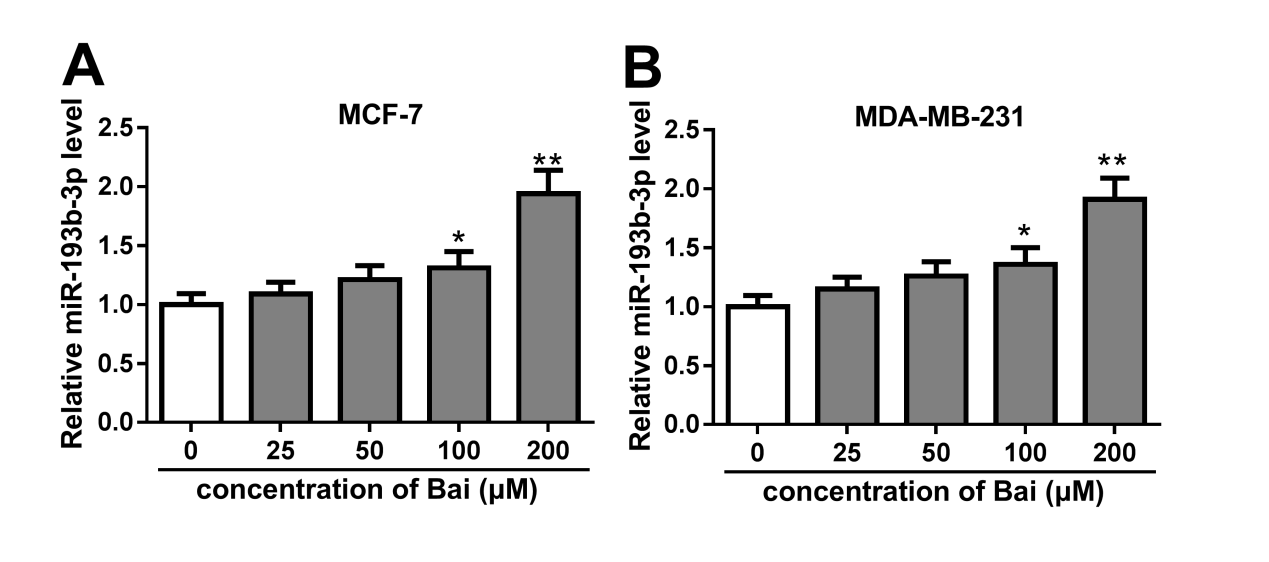


**Supplementary Figure 2. The effect of baicalin on miR-193b-3p expression.** (A and B) The expression level of miR-193b-3p was detected in MCF-7 and MDA-MB-231 cells after treatment of different concentrations of baicalin for 24 h by qRT-PCR. **P*<0.05, ***P*<0.01.
